# Supplementary material
Source: Springer Nature journal article supplement (https://www.springermedizin.de/resource/supplementary/12950_2012_282_MOESM4_ESM.pdf/9557474)

**(A)**

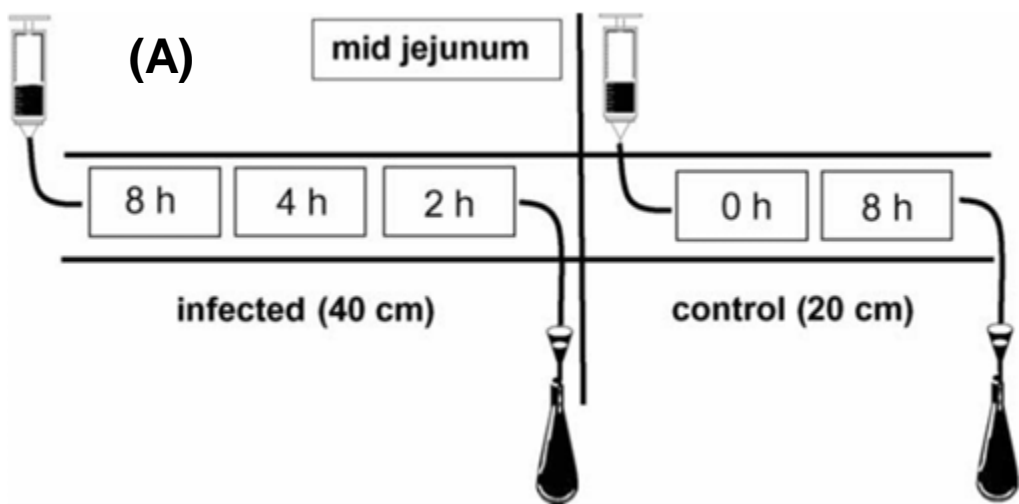

**(B) Salmonella versus control**  
pig 2, 3, and 4  
(3 isogenic comparisons)

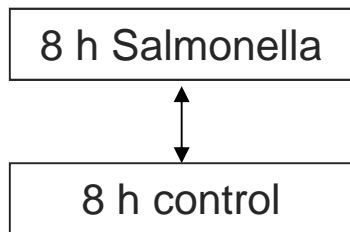

**(C) Salmonella segments; 2 and 4 h**  
(3 inter-animal comparisons)

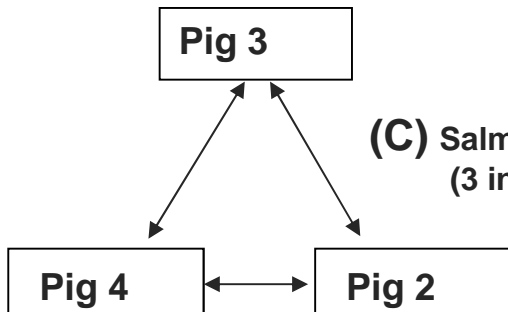

Supplement: MOESM4 [file 9557474]
